# Supplementary material for: High Temperature Alters Anthocyanin Concentration and Composition in Grape Berries of Malbec, Merlot, and Pinot Noir in a Cultivar-Dependent Manner
Source: MDPI journal article supplement (doi:10.3390/plants11070926), 2022-03-30
Supplement: s1 [file s1]

## SUPPLEMENTARY MATERIALS

### **High temperature alters anthocyanin concentration and composition in grape berries of Malbec, Merlot, and Pinot Noir in a cultivar-dependent manner**

Inés de Rosas, Leonor Deis, Yésica Baldo, Juan B. Cavagnaro, Pablo F. Cavagnaro

**Supplementary Table S1.** Concentration of nine anthocyanin pigments in berries of Malbec, Merlot, and Pinot Noir plants grown under increased (HT) and natural –control-temperature (C) conditions, during the fruit ripening process. Df, delphinidin-3-glucoside; Cn, cyanidin-3-glucoside; Pt, petunidin-3-glucoside; Po, peonidin-3-glucoside; Mv, malvidin-3-glucoside; PoAc, peonidin-3-O-acetylglucoside; MvAc, malvidin-3-O-acetylglucoside; PoCu, peonidin-3-O-coumaroyl-glucoside; MvCu, malvidin-3-O-coumaroyl-glucoside. Values are means  $\pm$  standard errors of four replicates, expressed as  $\mu\text{g}$  per g of berry skin ( $\mu\text{g}\cdot\text{g}^{-1}$  FW). Compounds significantly affected by the temperature treatments are denoted in bold letters, and their percentual decrease in concentration (% reduction) indicated. Asterisks indicate significant difference between HT and C treatments at  $p\leq 0.05$  (\*),  $p\leq 0.01$  (\*\*), and  $p\leq 0.001$  (\*\*\*), for a given year, phenological stage, and cultivar (DGC test).

Table S1.

| Anthocyanin/<br>Year | MALBEC              |                 |                |                     |                |                |                     |                |                |
|----------------------|---------------------|-----------------|----------------|---------------------|----------------|----------------|---------------------|----------------|----------------|
|                      | Veraison            |                 |                | Half ripeness       |                |                | Harvest             |                |                |
|                      | High<br>Temperature | Control         | %<br>reduction | High<br>Temperature | Control        | %<br>reduction | High<br>Temperature | Control        | %<br>reduction |
| <b>Df</b>            |                     |                 |                |                     |                |                |                     |                |                |
| 2017                 | 37.7 ± 5.5          | 83.5 ± 9.7**    | 50.0           | 159.6 ± 16.1        | 236.9 ± 40.8*  | 33.3           | 187.2 ± 39.1        | 187.3 ± 33.8   |                |
| 2018                 | 77.1 ± 13.2         | 127.0 ± 8.6*    | 38.5           | 136.5 ± 31.0        | 150.8 ± 11.0   |                | 144.6 ± 20.3        | 162.6 ± 9.6    |                |
| <b>Cn</b>            |                     |                 |                |                     |                |                |                     |                |                |
| 2017                 | 8.2 ± 1.2           | 20.6 ± 3.1*     | 50.0           | 42.6 ± 3.4          | 42.8 ± 10.8    |                | 40.7 ± 5.0          | 34.9 ± 2.9     |                |
| 2018                 | 9.1 ± 0.8           | 18.7 ± 1.7*     | 50.0           | 12.2 ± 3.4          | 11.0 ± 2.1     |                | 2.9 ± 0.6           | 3.3 ± 0.6      |                |
| <b>Pt</b>            |                     |                 |                |                     |                |                |                     |                |                |
| 2017                 | 72.0 ± 8.4          | 159.1 ± 14.8**  | 56.3           | 332.3 ± 27.7        | 426.9 ± 77.0   |                | 354.7 ± 67.8        | 348.5 ± 59.5   |                |
| 2018                 | 127.5 ± 20.0        | 201.2 ± 17.7*   | 35.0           | 239.7 ± 51.3        | 262.3 ± 15.7   |                | 265.6 ± 33.9        | 297.5 ± 14.1   |                |
| <b>Po</b>            |                     |                 |                |                     |                |                |                     |                |                |
| 2017                 | 32.6 ± 5.4          | 66.6 ± 8.5*     | 57.1           | 218.8 ± 20.5**      | 166.5 ± 25.2   | 22.7           | 288.3 ± 37.7*       | 172.1 ± 14.3   | 41.4           |
| 2018                 | 50.0 ± 5.6          | 80.9 ± 4.8*     | 37.5           | 57.9 ± 12.0         | 75.8 ± 3.7     |                | 9.3 ± 0.3           | 61.0 ± 26.1*   | 83.3           |
| <b>Mv</b>            |                     |                 |                |                     |                |                |                     |                |                |
| 2017                 | 399.1 ± 41.4        | 864.3 ± 63.8*** | 53.5           | 1916.1 ± 115.7      | 2181.2 ± 337.9 |                | 2306.5 ± 376.4      | 2108.6 ± 292.0 |                |
| 2018                 | 620.6 ± 81.8        | 912.0 ± 112.6*  | 31.9           | 1431.4 ± 260.0      | 1516.5 ± 60.3  |                | 1811.3 ± 222.1      | 2002.9 ± 50.1  |                |
| <b>PoAc</b>          |                     |                 |                |                     |                |                |                     |                |                |
| 2017                 | 2.4 ± 0.4           | 5.5 ± 0.6**     | 52.0           | 8.4 ± 0.9*          | 6.8 ± 1.63     | 19.0           | 5.3 ± 0.7*          | 3.5 ± 0.4      | 34.0           |
| 2018                 | 2.4 ± 0.2           | 2.6 ± 0.1       |                | 5.1 ± 0.5           | 4.5 ± 0.7      |                | 4.7 ± 0.4           | 4.3 ± 0.2      |                |
| <b>MvAc</b>          |                     |                 |                |                     |                |                |                     |                |                |
| 2017                 | 42.8 ± 5.3          | 101.0 ± 7.9**   | 60.0           | 106.2 ± 10.1        | 128.1 ± 30.9   |                | 58.4 ± 11.5         | 52.0 ± 6.2     |                |
| 2018                 | 8.6 ± 1.3           | 17.8 ± 5.7      |                | 18.3 ± 4.7*         | 7.0 ± 2.7      | 50.0           | 4.8 ± 0.7           | 5.5 ± 0.3      |                |
| <b>PoCu</b>          |                     |                 |                |                     |                |                |                     |                |                |
| 2017                 | 23.9 ± 2.2          | 45.8 ± 4.0**    | 60.0           | 63.4 ± 5.8*         | 49.0 ± 7.8     | 16.7           | 92.0 ± 9.4**        | 56.4 ± 7.0     | 33.3           |
| 2018                 | 21.9 ± 1.1          | 31.1 ± 0.8*     | 33.3           | 39.9 ± 4.4          | 37.2 ± 1.8     |                | 52.8 ± 3.9          | 47.5 ± 3.7     |                |
| <b>MvCu</b>          |                     |                 |                |                     |                |                |                     |                |                |
| 2017                 | 236.9 ± 24.2        | 516.6 ± 48.2**  | 53.8           | 637.4 ± 11.8        | 702.4 ± 99.7   |                | 917.1 ± 113.9       | 829.3 ± 92.4   |                |
| 2018                 | 223.1 ± 20.9        | 310.6 ± 45.7    |                | 860.3 ± 83.4*       | 727.6 ± 60.6   | 15.1           | 1019.8 ± 107.8      | 1015.3 ± 46.3  |                |

Table S1. *continued.*

| Anthocyanin/<br>Year | MERLOT               |                     |                |                     |                      |                |                      |                      |                |
|----------------------|----------------------|---------------------|----------------|---------------------|----------------------|----------------|----------------------|----------------------|----------------|
|                      | Veraison             |                     |                | Half ripeness       |                      |                | Harvest              |                      |                |
|                      | High<br>Temperature  | Control             | %<br>reduction | High<br>Temperature | Control              | %<br>reduction | High<br>Temperature  | Control              | %<br>reduction |
| <b>Df</b>            |                      |                     |                |                     |                      |                |                      |                      |                |
| 2017                 | 40.8 ± 8.3           | 26.5 ± 8.2          |                | <b>157.8 ± 15.8</b> | <b>218.4 ± 23.1*</b> | 27.3           | 233.2 ± 81.2         | 181.4 ± 30.9         |                |
| 2018                 | 81.2 ± 4.3           | 89.3 ± 16.9         |                | <b>65.0 ± 19.2</b>  | <b>138.2 ± 34.2*</b> | 50.0           | 133.9 ± 21.3         | 179.9 ± 19.8         |                |
| <b>Cn</b>            |                      |                     |                |                     |                      |                |                      |                      |                |
| 2017                 | 20.0 ± 3.3           | 14.3 ± 4.9          |                | 84.2 ± 6.7          | 94.5 ± 5.8           |                | <b>150.3 ± 25.1*</b> | <b>83.6 ± 15.3</b>   | 46.7           |
| 2018                 | 19.0 ± 2.7           | 28.4 ± 10.0         |                | <b>10.7 ± 3.9</b>   | <b>29.1 ± 8.0*</b>   | 66.7           | <b>23.3 ± 4.5</b>    | <b>48.4 ± 5.9*</b>   | 60.0           |
| <b>Pt</b>            |                      |                     |                |                     |                      |                |                      |                      |                |
| 2017                 | 65.6 ± 11.7          | 43.6 ± 11.4         |                | <b>271.8 ± 22.1</b> | <b>326.0 ± 28.3*</b> | 18.2           | 311.6 ± 90.7         | 274.2 ± 36.7         |                |
| 2018                 | 117.5 ± 7.1          | 95.61 ± 16.84       |                | <b>93.9 ± 22.1</b>  | <b>172.3 ± 32.2*</b> | 47.1           | 190.1 ± 27.1         | 236.3 ± 23.2         |                |
| <b>Po</b>            |                      |                     |                |                     |                      |                |                      |                      |                |
| 2017                 | 70.7 ± 9.6           | 54.5 ± 14.6         |                | 261.9 ± 22.9        | 247.1 ± 17.7         |                | <b>379.5 ± 71.1*</b> | <b>252.7 ± 23.0</b>  | 34.2           |
| 2018                 | 61.9 ± 4.0           | 63.4 ± 15.9         |                | <b>41.5 ± 11.8</b>  | <b>99.6 ± 22.0*</b>  | 60.1           | <b>99.2 ± 16.4</b>   | <b>159.7 ± 12.7*</b> | 37.5           |
| <b>Mv</b>            |                      |                     |                |                     |                      |                |                      |                      |                |
| 2017                 | <b>385.9 ± 60.0*</b> | <b>238.4 ± 50.2</b> | 38.5           | 1400.7 ± 116.6      | 1385.0 ± 48.9        |                | 1425.8 ± 350.4       | 1413.8 ± 144.2       |                |
| 2018                 | <b>574.6 ± 83.3*</b> | <b>344.1 ± 38.5</b> | 40.4           | <b>540.5 ± 74.1</b> | <b>778.2 ± 60.7*</b> | 30.8           | 1247.8 ± 133.2       | 1295.7 ± 121.2       |                |
| <b>PoAc</b>          |                      |                     |                |                     |                      |                |                      |                      |                |
| 2017                 | 6.3 ± 0.8            | 4.7 ± 1.3           |                | 11.9 ± 1.2          | 12.5 ± 0.7           |                | 5.7 ± 0.6            | 5.5 ± 0.5            |                |
| 2018                 | <b>1.3 ± 0.2*</b>    | <b>0.6 ± 0.1</b>    | 53.0           | 1.3 ± 0.1           | 1.2 ± 0.1            |                | <b>2.3 ± 0.3*</b>    | <b>1.5 ± 0.1</b>     | 36.9           |
| <b>MvAc</b>          |                      |                     |                |                     |                      |                |                      |                      |                |
| 2017                 | <b>51.2 ± 7.8*</b>   | <b>30.4 ± 6.7</b>   | 40.0           | 92.6 ± 16.1         | 100.2 ± 4.6          |                | 35.7 ± 4.6           | 47.8 ± 3.1           |                |
| 2018                 | <b>2.6 ± 0.4*</b>    | <b>0.8 ± 0.2</b>    | 69.0           | 1.4 ± 0.6           | 1.37 ± 0.3           |                | 8.5 ± 0.9            | 7.1 ± 1.3            |                |
| <b>PoCu</b>          |                      |                     |                |                     |                      |                |                      |                      |                |
| 2017                 | <b>9.6 ± 1.6*</b>    | <b>6.3 ± 1.9</b>    | 15.9           | 29.9 ± 3.1          | 24.5 ± 2.4           |                | <b>58.4 ± 11.9*</b>  | <b>42.4 ± 2.9</b>    | 33.3           |
| 2018                 | 11.4 ± 1.0           | 9.5 ± 1.6           |                | 11.7 ± 3.1          | 17.8 ± 2.0           |                | <b>26.5 ± 3.9</b>    | <b>38.5 ± 3.9*</b>   | 25.0           |
| <b>MvCu</b>          |                      |                     |                |                     |                      |                |                      |                      |                |
| 2017                 | <b>64.5 ± 11.4*</b>  | <b>40.0 ± 10.7</b>  | 33.3           | 164.4 ± 14.2        | 150.8 ± 1.4          |                | 215.1 ± 51.5         | 232.1 ± 29.2         |                |
| 2018                 | <b>88.0 ± 19.2*</b>  | <b>45.9 ± 3.9</b>   | 44.4           | 106.5 ± 13.9        | 132.0 ± 6.0          |                | 252.2 ± 28.4         | 242.8 ± 25.8         |                |

Table S1. *continued.*

| Anthocyanin/<br>Year | PINOT NOIR          |                    |                |                     |                    |                |                      |                       |                |
|----------------------|---------------------|--------------------|----------------|---------------------|--------------------|----------------|----------------------|-----------------------|----------------|
|                      | Veraison            |                    |                | Half ripeness       |                    |                | Harvest              |                       |                |
|                      | High<br>Temperature | Control            | %<br>reduction | High<br>Temperature | Control            | %<br>reduction | High<br>Temperature  | Control               | %<br>reduction |
| <b>Df</b>            |                     |                    |                |                     |                    |                |                      |                       |                |
| 2017                 | <b>10.1 ± 2.7</b>   | <b>6.4 ± 2.8*</b>  | 36.7           | 15.0 ± 1.3          | 13.9 ± 5.4         |                | 23.6 ± 1.5           | 22.6 ± 1.2            |                |
| 2018                 | <b>4.8 ± 0.9</b>    | <b>15.9 ± 5.2*</b> | 70.3           | <b>17.4 ± 5.4</b>   | <b>43.4 ± 1.7*</b> | 50.0           | <b>45.4 ± 7.4</b>    | <b>62.5 ± 4.8*</b>    | 16.7           |
| <b>Cn</b>            |                     |                    |                |                     |                    |                |                      |                       |                |
| 2017                 | 4.0 ± 0.3           | 2.8 ± 0.9          |                | 9.5 ± 0.9           | 8.5 ± 3.3          |                | 19.2 ± 2.4           | 16.6 ± 3.2            |                |
| 2018                 | 3.1 ± 1.1           | 5.5 ± 2.2          |                | 11.5 ± 2.6          | 12.8 ± 0.3         |                | <b>26.8 ± 7.2</b>    | <b>40.9 ± 1.4*</b>    | 25.0           |
| <b>Pt</b>            |                     |                    |                |                     |                    |                |                      |                       |                |
| 2017                 | 61.7 ± 14.3         | 45.4 ± 14.1        |                | 78.4 ± 7.3          | 68.8 ± 20.3        |                | 89.3 ± 2.8           | 93.9 ± 4.0            |                |
| 2018                 | 15.6 ± 3.4          | 36.7 ± 12.2        |                | <b>46.2 ± 12.1</b>  | <b>85.1 ± 4.2*</b> | 44.4           | <b>86.1 ± 10.1</b>   | <b>108.5 ± 4.6*</b>   | 18.2           |
| <b>Po</b>            |                     |                    |                |                     |                    |                |                      |                       |                |
| 2017                 | 137.1 ± 14.7        | 156.2 ± 14.5       |                | 219.5 ± 32.6        | 238.0 ± 49.6       |                | 328.3 ± 5.3          | 349.8 ± 42.7          |                |
| 2018                 | 66.7 ± 30.3         | 61.52 ± 16.10      |                | 165.7 ± 41.4        | 173.1 ± 10.2       |                | <b>318.1 ± 74.8</b>  | <b>417.9 ± 22.9*</b>  | 23.1           |
| <b>Mv</b>            |                     |                    |                |                     |                    |                |                      |                       |                |
| 2017                 | 1302.1 ± 196.9      | 1247.6 ± 123.2     |                | 1454.6 ± 141.1      | 1400.5 ± 167.4     |                | <b>1411.9 ± 38.1</b> | <b>1662.6 ± 60.1*</b> | 15.1           |
| 2018                 | 292.4 ± 79.3        | 392.8 ± 102.7      |                | 641.6 ± 156.8       | 811.7 ± 55.5       |                | <b>953.8 ± 74.7</b>  | <b>1136.4 ± 43.0*</b> | 16.7           |
| <b>PoAc</b>          |                     |                    |                |                     |                    |                |                      |                       |                |
| 2017                 | ND                  | ND                 |                | ND                  | ND                 |                | ND                   | ND                    |                |
| 2018                 | ND                  | ND                 |                | ND                  | ND                 |                | ND                   | ND                    |                |
| <b>MvAc</b>          |                     |                    |                |                     |                    |                |                      |                       |                |
| 2017                 | ND                  | ND                 |                | ND                  | ND                 |                | ND                   | ND                    |                |
| 2018                 | ND                  | ND                 |                | ND                  | ND                 |                | ND                   | ND                    |                |
| <b>PoCu</b>          |                     |                    |                |                     |                    |                |                      |                       |                |
| 2017                 | ND                  | ND                 |                | ND                  | ND                 |                | ND                   | ND                    |                |
| 2018                 | ND                  | ND                 |                | ND                  | ND                 |                | ND                   | ND                    |                |
| <b>MvCu</b>          |                     |                    |                |                     |                    |                |                      |                       |                |
| 2017                 | ND                  | ND                 |                | ND                  | ND                 |                | ND                   | ND                    |                |
| 2018                 | ND                  | ND                 |                | ND                  | ND                 |                | ND                   | ND                    |                |

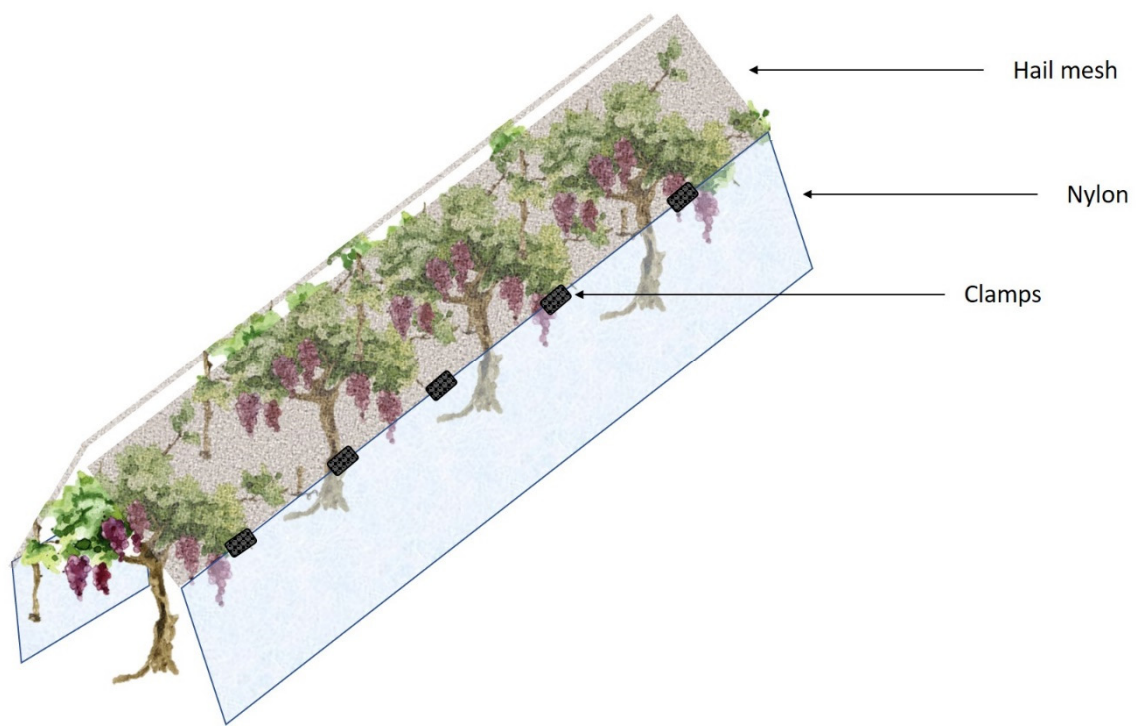

**Supplementary Figure S1.** Nylon structure used to increase temperature at berry site in the high temperature (HT) treatment.

**A****Malbec 2017**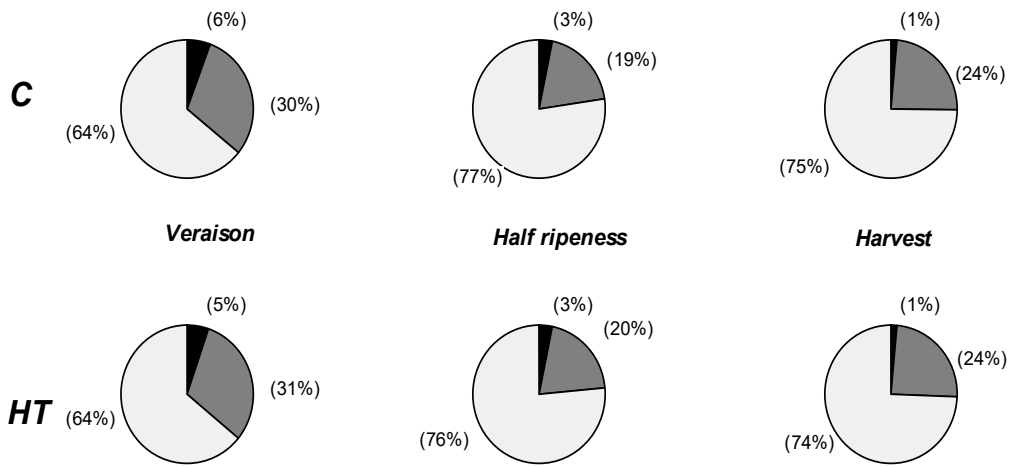**B****Malbec 2018**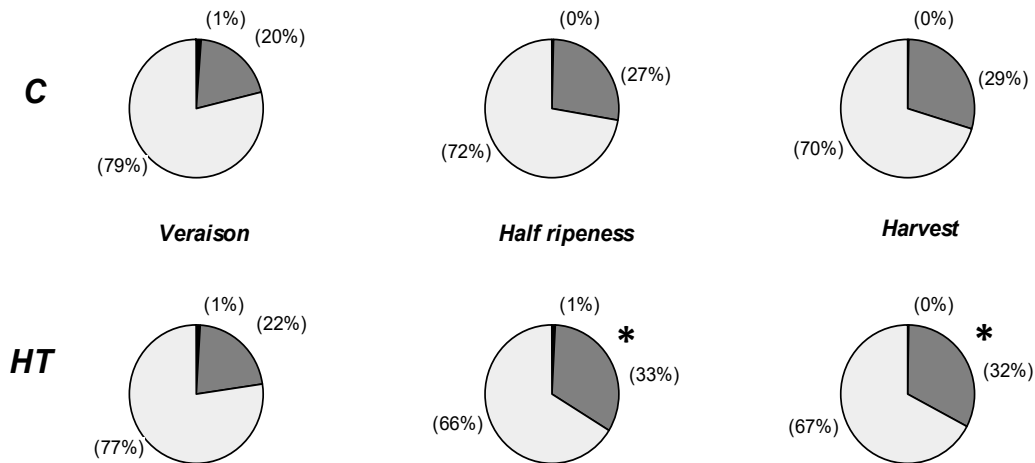

**Supplementary Figure S2.** Relative content (%) of acetylated (black), coumarylated (gray), and non-acylated anthocyanins (light gray) in berries of Malbec grown under high temperature (HT) and control (C) conditions, in 2017 (A) and 2018 (B). Data from four replicates are shown. Asterisks indicate statistical differences between non-acylated and acylated anthocyanins (i.e., coumarylated and acetylated combined) at  $p \leq 0.05$  between HT and C treatments at a given phenological stage (LSD test).

**A****Merlot 2017**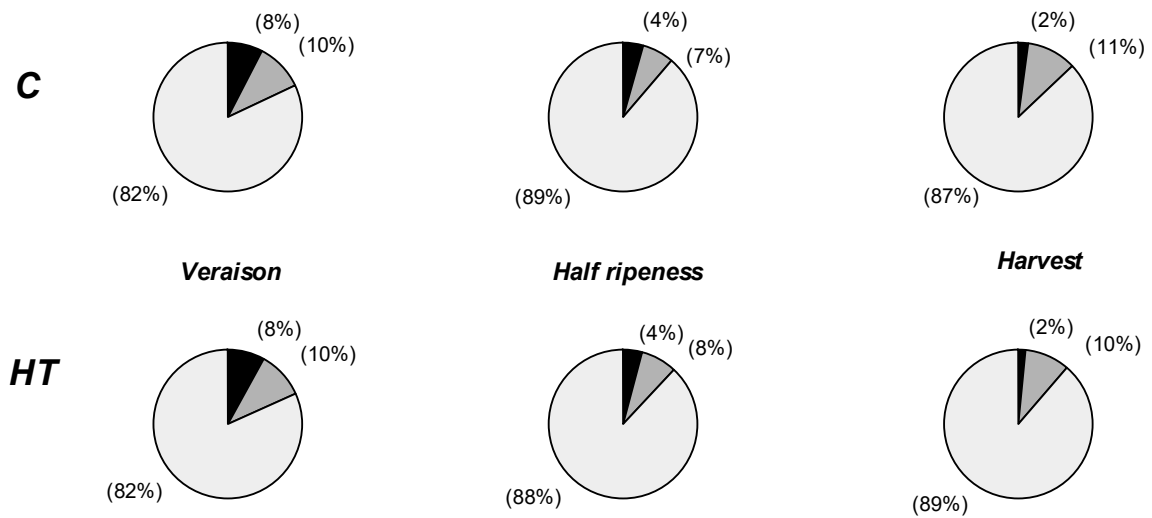**B****Merlot 2018**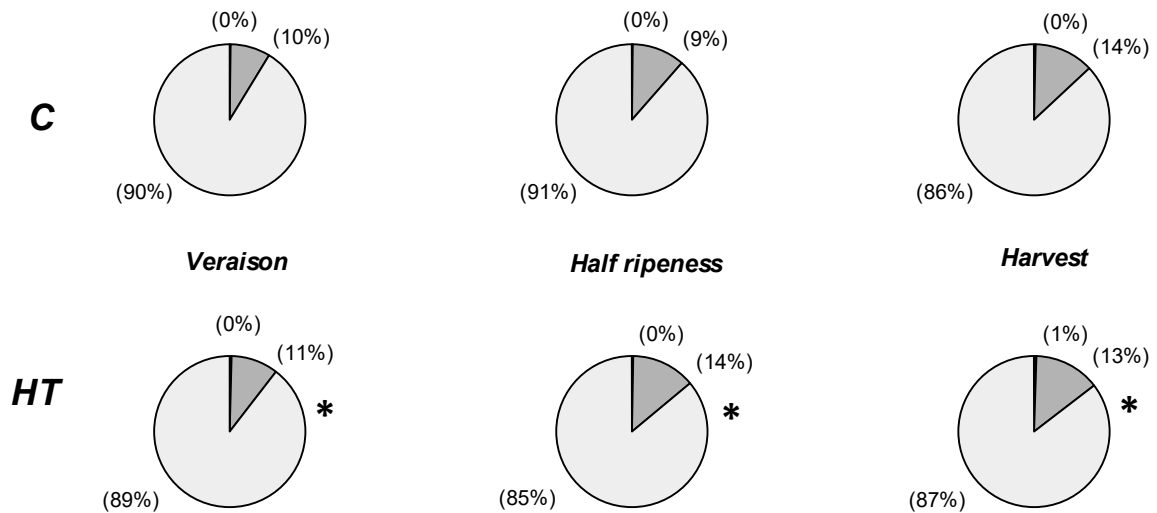

**Supplementary Figure S3.** Relative content (%) of acetylated (black), coumarylated (gray), and non-acetylated anthocyanins (light gray) in berries of Merlot grown under high temperature (HT) and control (C) conditions, in 2017 (A) and 2018 (B). Data from four replicates are shown. Asterisks indicate statistical differences between non-acetylated and acetylated anthocyanins (i.e., coumarylated and acetylated combined) at  $p \leq 0.05$  between HT and C treatments at a given phenological stage (LSD test).

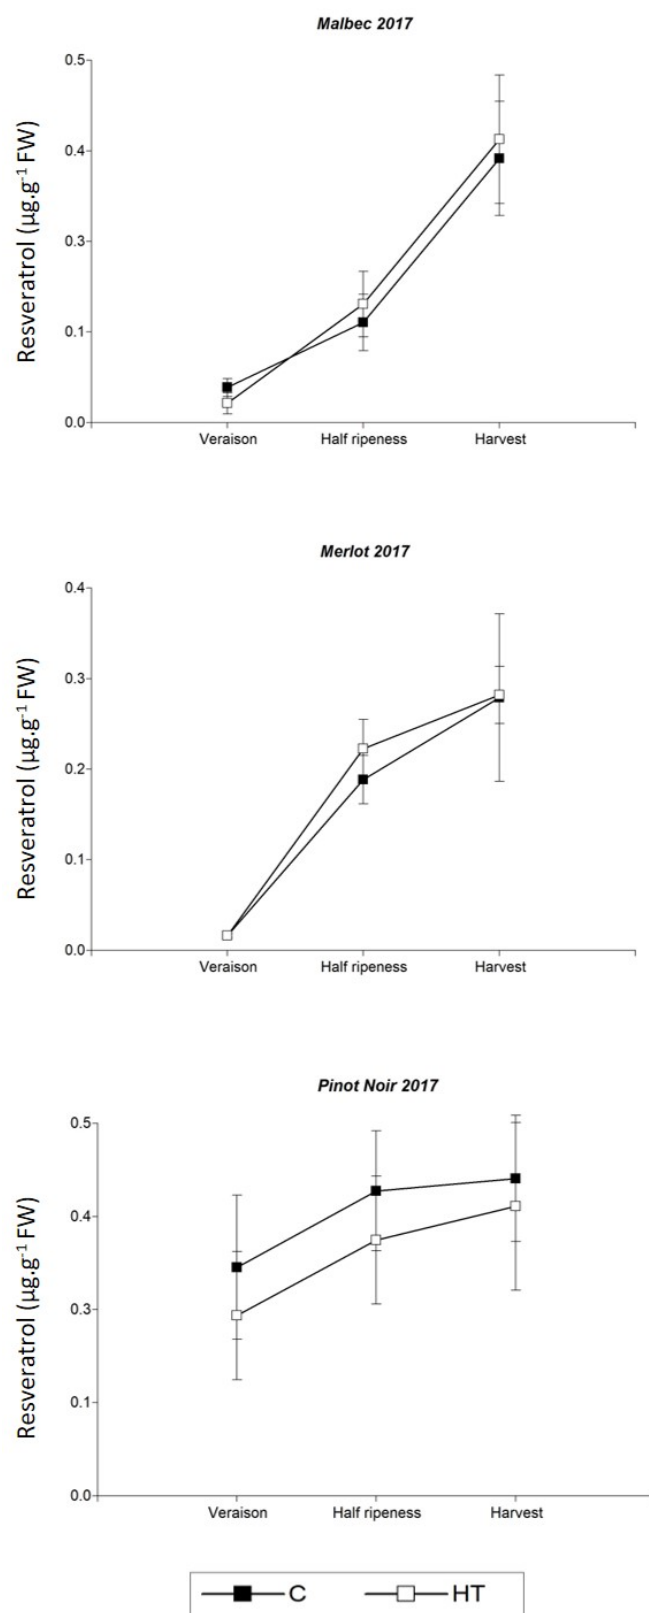

**Supplementary Figure S4.** *Trans*-resveratrol concentration in Malbec (A), Merlot (B) and Pinot Noir (C) berries grown under high temperature (HT) and control (C) conditions in 2017. Error bars represent standard errors from four replicates. Asterisks indicate statistical significance ( $p \leq 0.05$ ) between treatments according to mean comparison, LSD test. Resveratrol content in 2018 was determined in



berries of the three grape cultivars, but no significant differences were found between the HT and C treatments (data not shown), similarly to 2017.
